# Supplementary material for: Exploring the Brine Microbiota of a Traditional Norwegian Fermented Fish Product (Rakfisk) from Six Different Producers during Two Consecutive Seasonal Productions
Source: MDPI journal article supplement (doi:10.3390/foods8020072), 2019-02-14
Supplement: s1 [file s1]

1 **Supplementary material to:**  
2 **"Exploring the brine microbiota of a traditional Norwegian fermented fish product**  
3 **(*Rakfisk*) from six different producers during two consecutive seasonal productions"**  
4 by Bjerke et al.

5  
6 **Supplementary Table S1:** Classification of the MCR-ALS resolved components using the ribosomal database  
7 project (RDP) hierarchical classification. The taxonomic rank with a bootstrap confidence level (given in the  
8 brackets) above 80% (in bold typeface) was chosen to represent the corresponding components.

---

MCR 5 components

---

comp1 *Proteobacteria* [83%]; ***Gammaproteobacteria*** [80%]; *Alteromonadales* [38%];

*Alteromonadaceae* [23 %]; *Aliagarivorans* [20 %]

*Firmicutes* [100 %]; *Bacilli* [100 %]; ***Bacillales*** [87 %]; *Listeriaceae* [73 %];

comp2

*Brochothrix* [65 %]

*Firmicutes* [99 %]; *Bacilli* [99 %]; ***Lactobacillales*** [98 %]; *Lactobacillaceae* [72 %];

comp3

*Lactobacillus* [56 %]

*Proteobacteria*[99 %]; *Gammaproteobacteria* [99 %], *Pseudomonadales* [87 %];

comp4

*Moraxellaceae* [87 %]; ***Psychrobacter*** [81 %]

*Firmicutes* [100 %]; *Bacilli* [100 %]; *Lactobacillales* [100 %]; *Lactobacillaceae* [100 %];

comp5

***Lactobacillus*** [81 %]

---

9

10 **Supplementary Figure S1**

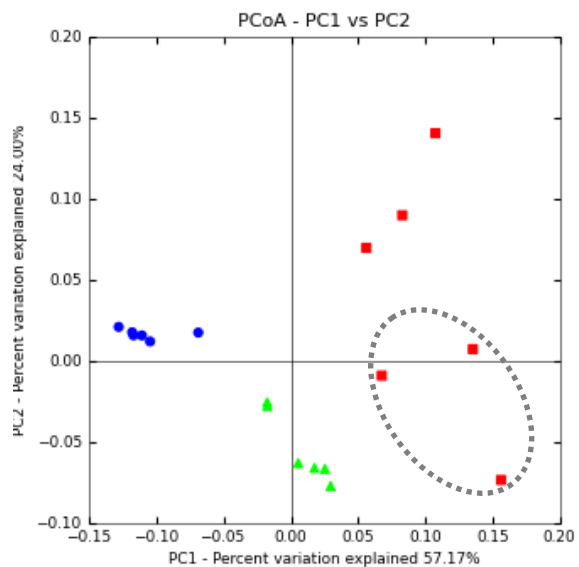

11  
12 Figure S1: PCoA plot visualizing the *weighted* UniFrac diversity between samples (MiSeq) collected day 91 from  
13 the three producers: 1; red squared shapes, 2; blue round shapes, 3; green delta shapes. The encircled data points  
14 represents samples collected from the second year from Producer 1.

15  
16
